# Supplementary material
Source: publisher figshare collection journal article supplement (https://acs.figshare.com/ndownloader/files/4275858)
Supplement: Supplementary file 1 [file 4275858]

**Supplemental Document:** “Photocatalytic Conversion of CO<sub>2</sub> to Hydrocarbon Fuels via Plasmon-Enhanced Absorption and Metallic Interband Transitions”

Wenbo Hou<sup>1</sup>, Wei Hsuan Hung<sup>3</sup>, Prathamesh Pavaskar<sup>2</sup>, Alain Goeppert<sup>1</sup>, Mehmet Aykol<sup>2</sup>, and Stephen B. Cronin<sup>1,2</sup>

Departments of <sup>1</sup>Chemistry, <sup>2</sup>Electrical Engineering, and <sup>3</sup>Materials Science  
University of Southern California, Los Angeles, CA 90089

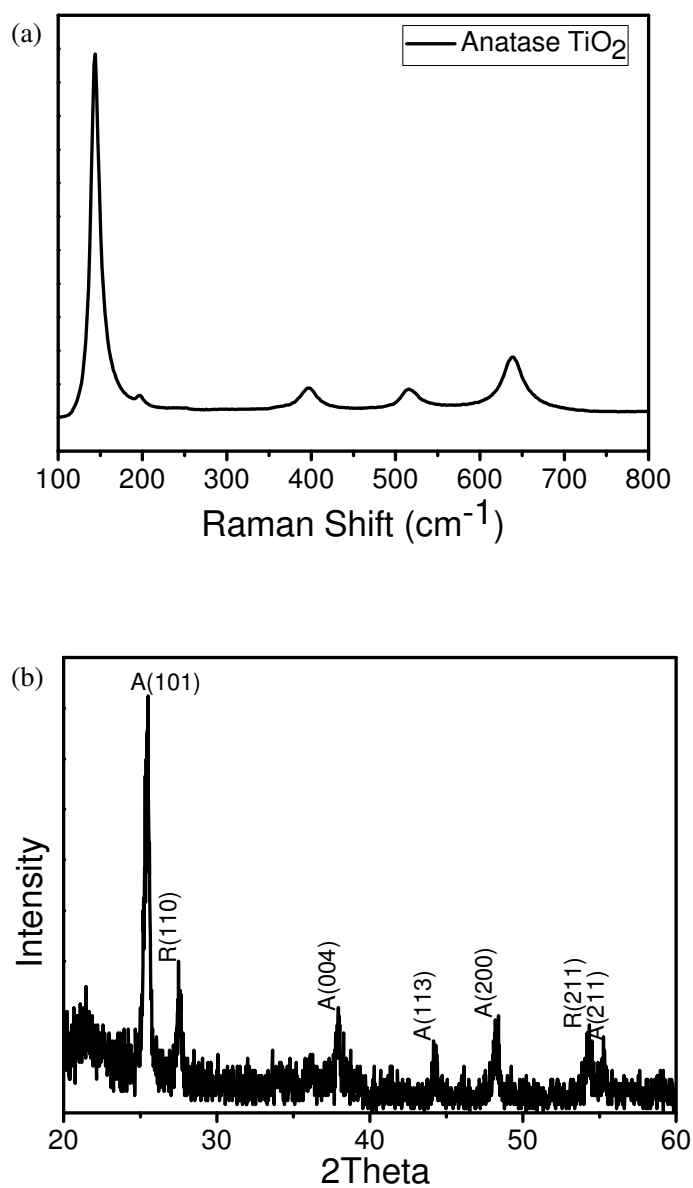

**Figure S1.** (a) Raman spectrum and (b) XRD profile of sol-gel TiO<sub>2</sub>.

The Raman spectrum and XRD profile shown in Figure S1 indicate the anatase crystalline phase of the sol-gel prepared  $\text{TiO}_2$  material. Weak reflections in the XRD data corresponding to the (110) and (211) planes of the rutile crystalline phase indicate that a small amount of rutile  $\text{TiO}_2$  is present in the sample.

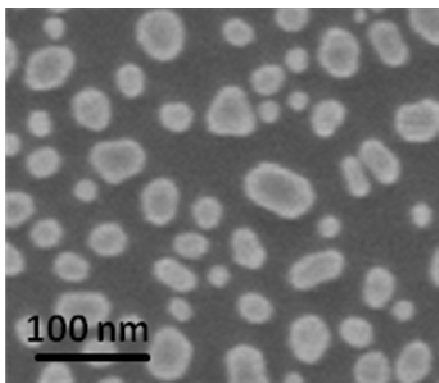

**Figure S2.** SEM image of 5 nm Au thin film after the second annealing.

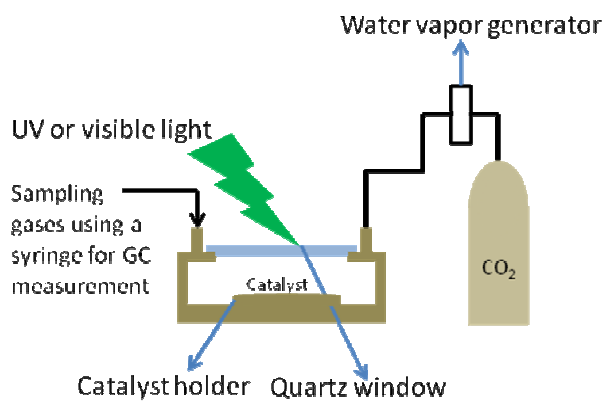

**Figure S3.** Schematic diagram of experimental setup.

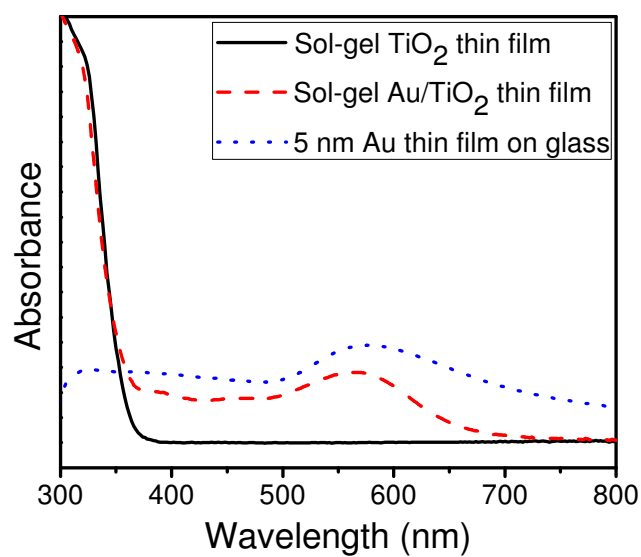

**Figure S4.** UV-vis absorption spectra of TiO<sub>2</sub> with and without gold nanoparticles and gold nanoparticles deposited on glass by electron-beam evaporation.

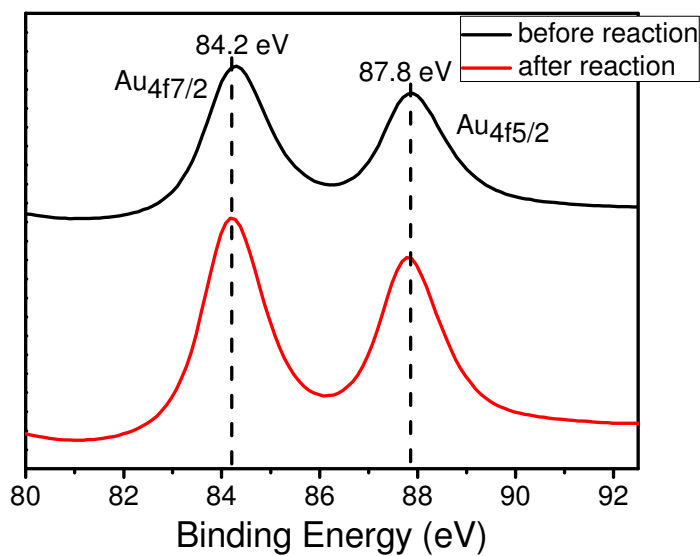

**Figure S5.** X-ray photoelectron spectra (XPS) of Au/TiO<sub>2</sub> sample before and after reactions.

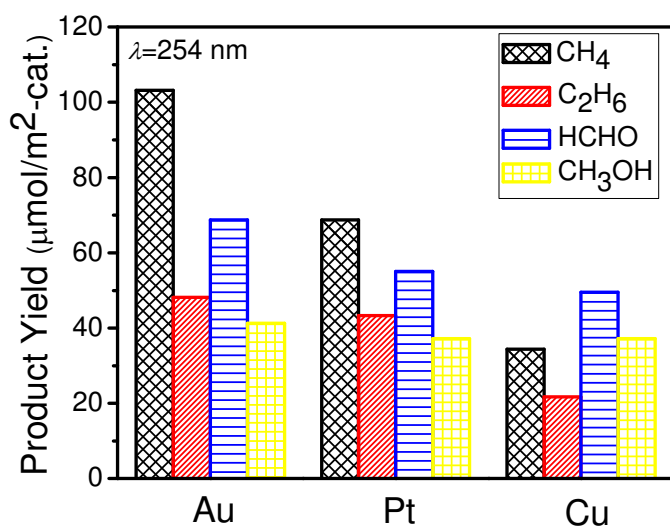

**Figure S6.** Photocatalytic product yields of 5 nm Pt on glass and a Cu foil compared with that of 5 nm Au on glass.

The photocatalytic reactions are considered to occur by the following schemes.<sup>1</sup>

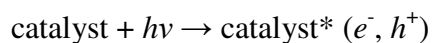

for oxidation

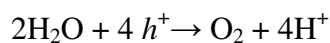

for reduction

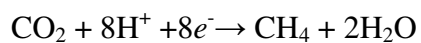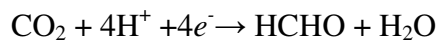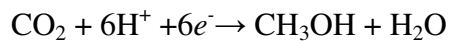

## References

1. Inoue, T.; Fujishima, A.; Konishi, S.; Honda, K., Photoelectrocatalytic Reduction of Carbon-Dioxide in Aqueous Suspensions of Semiconductor Powders. *Nature* **1979**, 277, (5698), 637-638.
